# Supplementary material for: Genetics of Smoking Behaviors in American Indians
Source: Oxford University Press journal article supplement (doi:10.1158/1055-9965.epi-20-0026), 2020-08-27
Supplement: 10559965epi200026-sup-235302_3_supp_6604201_qh85j3.xlsx [file 10559965epi200026-sup-235302_3_supp_6604201_qh85j3.xlsx]

## Sheet: Suppl_Table_1a
Supplementary Table 1a. Characteristics of the single nucleotide polymorphisms used in the analyses
Marker rs ID	Chromosome	Position	Gene_Symbol	Northern Plains				Southwest
				Minor Allele	Major Allele	MAF*		Minor Allele	Major Allele	MAF*
rs10033500	4	46922688	GABRA4	-	-	-		A	G	0.06
rs1003641	11	113273636	ANKK1/DRD2	A	G	0.171801		A	G	0.3925
rs10039221	5	174861613	MSX2/DRD1	G	A	0.132701		G	A	0.34
rs10053602	5	1428135	SLC6A3	G	A	0.191943		G	A	0.26
rs1008984	1	198330571	ATP6V1G3/NEK7	-	-	-		G	A	0.2925
rs1014263	17	37160446	FLJ43826/FBXO47	A	G	0.453791		A	G	0.394472
rs10242108	7	136571707	CHRM2	G	A	0.196682		G	A	0.180905
rs1028005	4	46941018	GABRA4	A	G	0.404028		A	G	0.265
rs1042173	17	28525011	SLC6A4	A	C	0.295122		A	C	0.306533
rs10485058	6	154445215	OPRM1/IPCEF1	-	-	-		G	A	0.085
rs10488602	7	136690503	CHRM2	A	G	0.446682		G	A	0.32
rs1048953	5	1438174	SLC6A3	A	G	0.0700713		-	-	-
rs10506645	12	72385500	TPH2	A	G	0.291469		A	G	0.245
rs10519613	4	142654084	IL15	A	C	0.441805		C	A	0.4775
rs10748185	12	72335855	TPH2	A	G	0.46778		G	A	0.359296
rs1076153	9	136498143	FAM163B/DBH	A	C	0.420428		A	C	0.485
rs1079785	11	18072273	SAAL1/TPH1	A	G	0.152019		A	G	0.1775
rs10819700	9	102635520	NR4A3/LOC441461	G	A	0.498815		G	A	0.4975
rs10833	4	142654547	IL15	A	G	0.0952381		A	G	0.06
rs10840491	11	2194390	TH/ASCL2	A	G	0.0817536		-	-	-
rs10879352	12	72406958	TPH2	A	G	0.319905		A	G	0.29
rs10891552	11	113333671	DRD2	A	T	0.472749		A	T	0.415
rs10993947	9	136510122	DBH	-	-	-		A	G	0.0825
rs11042978	11	2198418	TH/ASCL2	C	A	0.352381		C	A	0.4475
rs1111418	7	136633704	CHRM2	G	A	0.263033		G	A	0.175
rs1112828	4	139956970	CCRN4L	C	A	0.401659		C	A	0.29
rs11133762	5	1391161	SLC6A3/CLPTM1L	A	G	0.152381		A	G	0.11
rs11179003	12	72343287	TPH2	A	G	0.138626		A	G	0.0825
rs11179022	12	72370746	TPH2	A	G	0.152844		A	G	0.1275
rs11179045	12	72407403	TPH2	A	T	0.162322		A	T	0.12
rs11179056	12	72414171	TPH2	A	G	0.188249		A	G	0.15
rs11179065	12	72421501	TPH2	A	G	0.182464		A	G	0.16
rs1124492	11	113282275	DRD2	A	C	0.138955		A	C	0.3575
rs11246221	11	630124	SCT/DRD4	G	A	0.151659		G	A	0.145
rs11264222	1	154554357	ADAR/CHRNB2	A	G	0.0734597		A	G	0.1
rs1127313	1	154556425	ADAR	G	A	0.39455		A	G	0.415
rs1131339	9	102627302	NR4A3	G	A	0.236967		G	A	0.2575
rs11503014	4	46390865	GABRA2	C	G	0.200713		-	-	-
rs1159315	4	47003076	GABRB1/GABRA4	G	A	0.430095		G	A	0.18
rs1160093	4	46949770	GABRA4	C	G	0.0675355		C	G	0.0925
rs11747728	5	174863502	DRD1/MSX2	G	A	0.0687204		G	A	0.1875
rs11762896	7	136709168	CHRM2/PTN	A	G	0.110714		A	G	0.085
rs11942294	4	142517416	ZNF330/LOC100286983	G	A	0.295724		G	A	0.175
rs12130403	1	154549470	CHRNB2	G	A	0.241706		G	A	0.31
rs12208947	6	154491137	IPCEF1	-	-	-		A	G	0.135
rs12229394	12	72392914	TPH2	A	G	0.449052		A	G	0.37
rs12231356	12	72409548	TPH2	A	G	0.163507		A	G	0.13
rs12292915	11	18038118	SERGEF/TPH1	A	C	0.322275		C	A	0.4075
rs12508866	4	142565693	LOC100286983	G	A	0.418246		G	A	0.355
rs12537831	7	136556626	CHRM2	A	G	0.0699052		-	-	-
rs12654851	5	1454004	LPCAT1/SLC6A3	A	C	0.290284		A	C	0.27
rs129885	9	136527226	DBH/SARDH	A	C	0.370546		A	C	0.484925
rs129930	9	136530020	SARDH	A	C	0.126777		A	C	0.15
rs13106911	4	142615745	IL15	A	G	0.445498		G	A	0.4825
rs13117878	4	142599222	IL15	G	A	0.49763		G	A	0.4
rs13152740	4	46381221	GABRA2	A	G	0.188389		A	G	0.115
rs13193545	6	154461822	IPCEF1/OPRM1	-	-	-		G	A	0.0575
rs13203628	6	154461123	OPRM1/IPCEF1	G	A	0.0627962		G	A	0.0829146
rs1320892	7	143752228	OR2A25/OR2A5	G	A	0.219194		G	A	0.16
rs13295822	9	102575680	NR4A3/SEC61B	A	G	0.291469		A	G	0.29
rs1344870	3	21307401	VENTXP7/SGOL1	A	C	0.372038		A	C	0.1825
rs1364403	7	136588827	CHRM2	A	G	0.490291		A	G	0.2325
rs1373302	8	72957716	TRPA1	A	T	0.169834		A	T	0.1325
rs1386483	12	72412494	TPH2	A	G	0.464455		G	A	0.46
rs1386493	12	72355179	TPH2	A	G	0.190758		A	G	0.16
rs1398174	4	46927145	GABRA4	A	C	0.363744		A	C	0.2475
rs1402812	4	142441666	LOC100286983/ZNF330	G	C	0.32346		G	C	0.3275
rs1403454	4	149734968	LOC100287246/NR3C2	T	A	0.24763		T	A	0.2675
rs1405209	9	102585545	NR4A3	G	A	0.161137		G	A	0.14
rs140701	17	28538532	SLC6A4	G	A	0.356635		G	A	0.37
rs1424543	7	136632003	CHRM2	C	G	0.0758294		C	G	0.0653266
rs1424569	7	136569416	CHRM2	A	G	0.417062		G	A	0.3525
rs1424572	7	136560679	CHRM2	G	A	0.316351		A	G	0.44
rs1435090	2	50214739	NRXN1	A	G	0.221564		A	G	0.1975
rs1455857	7	136639941	CHRM2	G	A	0.182464		G	A	0.1975
rs1461227	5	153169594	GRIA1	T	A	0.299763		T	A	0.16
rs1464612	18	25915140	CDH2/DSC3	A	G	0.365796		A	G	0.3325
rs1465648	3	87950229	POU1F1/HTR1F	A	G	0.0665083		A	G	0.105
rs1469179	7	136621677	CHRM2	A	T	0.123223		-	-	-
rs1487214	11	19632139	LOC100126784/NAV2	G	A	0.103081		G	A	0.09
rs1487275	12	72410292	TPH2	C	A	0.274882		C	A	0.3075
rs1506069	1	225203196	DNAH14	G	A	0.366114		-	-	-
rs1519551	4	142570472	LOC100286983	G	A	0.492891		G	A	0.39
rs1541332	9	136511516	DBH	G	A	0.135392		G	A	0.2375
rs1594335	10	77346063	C10orf41/C10orf11	-	-	-		G	A	0.361809
rs1611114	9	136500203	FAM163B/DBH	A	G	0.452494		G	A	0.4775
rs1611115	9	136500515	FAM163B/DBH	A	G	0.397862		A	G	0.2925
rs165824	22	19959366	ARVCF	G	A	0.374109		-	-	-
rs167771	3	113876275	DRD3	G	A	0.150474		G	A	0.2875
rs16822416	3	113890310	DRD3	-	-	-		A	G	0.195
rs16859227	4	46250605	GABRG1/GABRA2	A	G	0.270142		A	G	0.175
rs16969968	15	78882925	CHRNA5	A	G	0.0758294		A	G	0.05
rs17065021	5	174858052	MSX2/DRD1	A	G	0.25		A	G	0.1075
rs17110489	12	72348006	TPH2	G	A	0.290284		G	A	0.245
rs17110566	12	72366647	TPH2	A	G	0.297393		A	G	0.3525
rs17110690	12	72407997	TPH2	A	G	0.285545		-	-	-
rs17168817	7	136626840	CHRM2	A	G	0.337678		A	G	0.105
rs172423	11	18056225	TPH1	G	A	0.0876777		G	A	0.085
rs17354547	4	142390869	ZNF330/LOC100286983	C	A	0.32346		C	A	0.3225
rs174675	22	19934051	COMT	G	A	0.494076		G	A	0.351759
rs174696	22	19953176	COMT	A	G	0.13981		-	-	-
rs174699	22	19954458	COMT	G	A	0.332933		A	G	0.449495
rs17529477	11	113317067	DRD2	A	G	0.07109		-	-	-
rs17641411	4	46943687	GABRA4	A	G	0.425355		A	G	0.4675
rs17641660	4	46982218	GABRA4	A	C	0.459036		A	C	0.3225
rs1799971	6	154360797	OPRM1	G	A	0.179335		-	-	-
rs1799978	11	113346351	TMPRSS5/DRD2	G	A	0.0864929		G	A	0.1375
rs1800404	15	28235773	OCA2	G	A	0.475118		G	A	0.393939
rs1800497	11	113270828	ANKK1	G	A	0.243437		G	A	0.42
rs1800498	11	113291588	DRD2	A	G	0.10782		A	G	0.05
rs1808089	8	76220656	CRISPLD1/HNF4G	A	G	0.221564		A	G	0.0875
rs1850744	4	9790712	SLC2A9/DRD5	A	G	0.104513		-	-	-
rs1872824	12	72430314	LOC283392/TPH2	A	G	0.433649		A	G	0.4925
rs1877751	20	57967906	LOC645605/EDN3	-	-	-		A	G	0.0975
rs1881826	6	148341758	SAMD5/SASH1	G	A	0.494076		G	A	0.4425
rs1891760	10	115259106	HABP2/TCF7L2	G	A	0.186461		G	A	0.14
rs1893829	18	74954315	GALR1/MBP	A	G	0.399289		G	A	0.455
rs1948	15	78917399	CHRNB4	A	G	0.0616114		A	G	0.07
rs1980888	9	91900556	SHC3/CKS2	G	A	0.200237		G	A	0.1375
rs2000841	18	74987007	GALR1/LOC100132713	T	A	0.196682		T	A	0.2625
rs2001144	6	108407662	OSTM1/LOC100287366	C	A	0.339667		C	A	0.4975
rs2007153	9	136503819	DBH	A	G	0.433492		A	G	0.34
rs2019884	12	98481159	LOC121456/RMST	C	G	0.163507		C	G	0.2875
rs2055942	4	46968050	GABRA4	-	-	-		G	A	0.06
rs2065160	1	204790977	NFASC/LRRN2	A	G	0.241093		A	G	0.1825
rs2066713	17	28551665	SLC6A4	A	G	0.277251		A	G	0.246231
rs2072658	1	154540225	CHRNB2/UBE2Q1	A	G	0.195498		A	G	0.0975
rs2072660	1	154548721	CHRNB2	A	G	0.257757		A	G	0.2775
rs2078588	13	72301632	DACH1	-	-	-		A	C	0.1025
rs211102	11	18046493	TPH1	G	A	0.401659		A	G	0.3225
rs211107	11	18058341	TPH1	A	C	0.254157		A	C	0.4925
rs2113550	7	136566533	CHRM2	A	G	0.481043		G	A	0.301508
rs2119767	4	46391573	GABRA2	T	A	0.441943		T	A	0.295
rs2129575	12	72340073	TPH2	A	C	0.452607		A	C	0.34
rs2134655	3	113858201	DRD3	A	G	0.164692		A	G	0.0975
rs2149589	9	79201074	LOC392352/PRUNE2	G	A	0.135071		G	A	0.09
rs2156641	18	74985178	LOC100132713/GALR1	C	A	0.280806		C	A	0.185
rs2207782	10	83757199	NRG3	G	A	0.186461		G	A	0.1425
rs2221855	4	46961617	GABRA4	A	C	0.304502		A	C	0.125
rs2225251	1	43529203	SLC2A1/FAM183A	A	G	0.263033		A	G	0.3375
rs2280075	4	46966825	GABRA4	-	-	-		G	A	0.0525
rs2295676	6	154520392	IPCEF1	G	A	0.417062		G	A	0.4275
rs2317212	3	97328284	EPHA6	C	A	0.267773		C	A	0.155
rs2322301	4	142636313	IL15	G	A	0.452494		G	A	0.4025
rs2341823	7	132093863	PLXNA4	C	A	0.327014		C	A	0.374372
rs2350780	7	136592969	CHRM2	A	G	0.206161		A	G	0.195
rs2396676	7	113327166	PPP1R3A/LOC100287664	A	G	0.369668		A	G	0.45
rs2455391	5	1443498	SLC6A3	A	G	0.171021		A	G	0.3075
rs247008	5	131447104	P4HA2/CSF2	A	G	0.240521		A	G	0.341709
rs2479409	1	55504650	BSND/PCSK9	A	G	0.291469		A	G	0.165
rs250682	5	1427803	SLC6A3	C	G	0.328199		C	G	0.325
rs2519147	9	136495318	FAM163B/DBH	G	A	0.0916667		G	A	0.12
rs2519148	9	136494566	FAM163B/DBH	G	A	0.440191		A	G	0.452261
rs2519154	9	136512275	DBH	A	G	0.0995261		A	G	0.175
rs2519155	9	136504598	DBH	-	-	-		G	A	0.1225
rs2613964	3	112860780	BOC/C3orf17	A	G	0.475118		G	A	0.2675
rs26247	5	106804363	EFNA5	A	G	0.327791		A	G	0.315
rs2630351	3	113875059	DRD3	A	G	0.0533175		A	G	0.085
rs265971	5	174860411	MSX2/DRD1	G	A	0.212085		G	A	0.1575
rs265976	5	174862420	MSX2/DRD1	A	C	0.104067		-	-	-
rs2695	9	82884577	TLE4/TLE1	G	A	0.157583		G	A	0.1975
rs2702414	4	179399523	LOC285501/LOC100288304	G	A	0.473934		G	A	0.4225
rs27048	5	1412645	SLC6A3	A	G	0.187204		A	G	0.22
rs2717162	18	74968327	GALR1	G	A	0.383886		G	A	0.34
rs2734831	11	113293596	DRD2	C	A	0.106635		C	A	0.05
rs2752	1	234513871	C1orf31	C	A	0.328199		C	A	0.4525
rs279849	4	46320757	GABRA2	C	A	0.402613		C	A	0.48
rs279858	4	46314593	GABRA2	A	G	0.406398		A	G	0.4875
rs2816	17	7923564	GUCY2D	A	G	0.0876777		-	-	-
rs2829556	21	26512579	NCAM2/NCRNA00158	C	G	0.492891		C	G	0.2975
rs285	8	19815189	LPL	A	G	0.46327		A	G	0.3875
rs2850889	18	74958607	MBP/GALR1	G	A	0.292654		G	A	0.1175
rs2862	15	35145553	ACTC1/AQR	A	G	0.298578		A	G	0.265
rs2873804	9	136505644	DBH	G	A	0.164692		G	A	0.2925
rs2888998	9	30979640	LOC100288436/ACO1	A	G	0.366114		A	G	0.485
rs2895680	5	146644115	STK32A	G	A	0.0592417		-	-	-
rs2900223	9	102596321	NR4A3	G	A	0.469194		G	A	0.454774
rs292932	16	72782824	ZFHX3/PMFBP1	A	G	0.452494		A	G	0.4475
rs2937639	5	1443728	SLC6A3	G	A	0.23753		G	A	0.3425
rs3025373	9	136496708	DBH/FAM163B	G	A	0.131265		-	-	-
rs3025405	9	136510762	DBH	G	A	0.14218		G	A	0.11
rs324582	7	136650607	CHRM2	G	A	0.264218		A	G	0.4925
rs324594	7	136655323	CHRM2	A	G	0.495261		G	A	0.28392
rs324650	7	136693661	CHRM2	-	-	-		A	T	0.0875
rs3287	2	54807657	SPTBN1	G	A	0.165877		G	A	0.26
rs3309	5	56092779	LOC100289077/MAP3K1	T	A	0.251185		T	A	0.37
rs3340	5	153831867	SAP30L	A	G	0.492891		A	G	0.3325
rs3732790	3	113847283	DRD3/QTRTD1	A	T	0.43128		A	T	0.4175
rs3735028	7	136558158	CHRM2	G	A	0.450237		G	A	0.27
rs3756450	5	1448148	SLC6A3/LPCAT1	G	A	0.305226		G	A	0.278894
rs3758653	11	636399	SCT/DRD4	G	A	0.404028		G	A	0.435
rs3773678	3	113870078	DRD3	A	G	0.0699052		A	G	0.0975
rs3792211	4	46994495	GABRA4	A	C	0.0521327		A	C	0.065
rs3798683	6	154418414	OPRM1	A	G	0.263095		-	-	-
rs3849591	4	46368641	GABRA2	A	C	0.422986		C	A	0.3675
rs3935748	12	72325737	TBC1D15/TPH2	G	C	0.317536		G	C	0.2225
rs3971872	15	78942035	LOC646934/CHRNB4	A	G	0.109005		A	G	0.1575
rs40184	5	1395077	SLC6A3	A	G	0.105769		A	G	0.255
rs403636	5	1438354	SLC6A3	A	C	0.407363		A	C	0.374372
rs4130405	8	99420775	NIPAL2/KCNS2	A	C	0.203791		A	C	0.3275
rs4245147	11	113318007	DRD2	G	A	0.209716		G	A	0.235
rs4274224	11	113319452	DRD2	G	A	0.239336		G	A	0.305
rs4436578	11	113306765	DRD2	G	A	0.136256		G	A	0.285
rs4565946	12	72336769	TPH2	A	G	0.248815		A	G	0.3475
rs464049	5	1423905	SLC6A3	A	G	0.478622		A	G	0.4175
rs4646	15	51502844	CYP19A1	A	C	0.422986		C	A	0.335
rs4646316	22	19952132	COMT	A	G	0.102381		-	-	-
rs4648318	11	113313389	DRD2	G	A	0.155213		G	A	0.3275
rs4680	22	19951271	COMT	A	G	0.391566		A	G	0.2975
rs4695187	4	47003829	GABRA4/GABRB1	A	C	0.183649		A	C	0.4625
rs4767387	12	116634170	MED13L	G	C	0.469194		G	C	0.3725
rs4809957	20	52771171	CYP24A1	G	A	0.39218		G	A	0.43
rs483481	6	154463968	OPRM1/IPCEF1	G	A	0.471564		G	A	0.2375
rs4870266	6	154368998	OPRM1	A	G	0.354265		A	G	0.235
rs4870268	6	154472327	IPCEF1/OPRM1	G	A	0.295024		G	A	0.1375
rs4885346	13	76323485	LMO7	A	T	0.453791		A	T	0.3425
rs4908736	1	8187211	SLC45A1/ERRFI1	A	G	0.42654		A	G	0.3025
rs4938019	11	113341391	DRD2	G	A	0.489336		G	A	0.4225
rs4956396	4	142442790	LOC100286983/ZNF330	A	G	0.32346		A	G	0.325
rs4975646	5	1433401	SLC6A3	A	G	0.0627962		-	-	-
rs512053	6	154439517	OPRM1	A	C	0.293839		A	C	0.43
rs514980	6	154368167	OPRM1	G	A	0.236967		G	A	0.405
rs518596	6	154462378	OPRM1/IPCEF1	G	A	0.131517		G	A	0.15
rs5326	5	174870196	DRD1	A	G	0.218009		A	G	0.0875
rs5374	18	74962645	GALR1	G	A	0.407583		G	A	0.2625
rs5381	18	74981161	GALR1	A	G	0.108434		-	-	-
rs541418	4	46253216	GABRA2	A	G	0.393365		A	G	0.4175
rs5443	12	6954875	GNB3	A	G	0.432304		A	G	0.4275
rs548646	6	154418147	OPRM1	A	G	0.0959716		A	G	0.14
rs554112	4	46262776	GABRA2	C	A	0.406176		C	A	0.49
rs563649	6	154407967	OPRM1	A	G	0.202607		A	G	0.42
rs563654	10	98478449	PIK3AP1	G	A	0.458531		G	A	0.375
rs569284	6	154464330	IPCEF1/OPRM1	C	A	0.238152		C	A	0.155
rs573400	4	46252066	GABRA2	A	G	0.39218		A	G	0.4175
rs578776	15	78888400	CHRNA3	-	-	-		G	A	0.11
rs5993883	22	19937638	COMT	C	A	0.229858		C	A	0.155
rs613355	6	154449850	OPRM1/IPCEF1	C	A	0.104265		C	A	0.1575
rs615470	15	78885988	CHRNA5	A	G	0.0699052		A	G	0.0603015
rs623580	11	18063977	TPH1/SAAL1	T	A	0.332938		A	T	0.415
rs6356	11	2190951	TH	G	A	0.308057		G	A	0.325
rs6467694	7	136546916	LUZP6/MTPN	-	-	-		G	A	0.07
rs6495308	15	78907656	CHRNA3	-	-	-		A	G	0.115
rs6495309	15	78915245	CHRNA3/CHRNB4	G	A	0.209716		G	A	0.27
rs6537064	4	142658406	INPP4B/IL15	G	A	0.4609		G	A	0.4025
rs656905	6	154435232	OPRM1	G	A	0.0604265		G	A	0.08
rs6582072	12	72354477	TPH2	A	G	0.170616		A	G	0.115
rs6589377	11	113355736	DRD2/TMPRSS5	G	A	0.07109		-	-	-
rs6730157	2	135907088	RAB3GAP1	A	G	0.0902613		-	-	-
rs6837991	4	142558755	LOC100286983	A	G	0.0556872		-	-	-
rs6850492	4	142637305	IL15	A	G	0.111639		A	G	0.0825
rs6856130	4	46393160	GABRA2/COX7B2	G	A	0.135071		G	A	0.175
rs686	5	174868700	DRD1	G	A	0.267773		-	-	-
rs6878159	5	174876401	DRD1/SFXN1	T	A	0.184834		T	A	0.0775
rs6944132	7	136570276	CHRM2	A	T	0.440758		T	A	0.415
rs6947206	7	136615111	CHRM2	C	G	0.123223		-	-	-
rs7022059	9	102592688	NR4A3	A	G	0.167064		A	G	0.145
rs7131056	11	113329774	DRD2	A	C	0.350711		A	C	0.3575
rs717091	13	44685946	LOC121838/LOC100287738	-	-	-		A	G	0.3475
rs718092	20	38227016	LOC339568/MAFB	G	C	0.25237		G	C	0.2375
rs718387	21	37128077	RUNX1/SETD4	A	G	0.32346		A	G	0.305
rs719776	4	33686660	PCDH7/ARAP2	G	C	0.306872		G	C	0.2675
rs723822	1	165016732	PBX1/LMX1A	A	T	0.32346		A	T	0.255
rs726391	12	19026082	CAPZA3/PLEKHA5	C	G	0.42891		C	G	0.4975
rs7315855	12	72423270	TPH2	A	G	0.18128		A	G	0.145
rs732833	9	136520662	DBH	G	A	0.449052		G	A	0.335
rs737866	22	19930109	COMT	G	A	0.100711		-	-	-
rs7483056	11	2190519	TH	A	G	0.240521		A	G	0.1925
rs7595509	2	68116027	ETAA1/C1D	-	-	-		G	A	0.185
rs7633291	3	113887068	DRD3	C	A	0.271327		C	A	0.3075
rs764679	16	8483520	TMEM114/A2BP1	C	G	0.475059		C	G	0.404523
rs7665758	4	46957697	GABRA4	-	-	-		A	C	0.11
rs768324	3	85139401	LOC100289598/CADM2	T	A	0.43128		T	A	0.4325
rs7694035	4	46985750	GABRA4	A	C	0.235782		A	C	0.0525
rs7780181	7	136706535	CHRM2/PTN	C	A	0.116114		C	A	0.1
rs77905	9	136518097	DBH	A	G	0.210024		A	G	0.15
rs7806357	7	136620152	CHRM2	A	G	0.0734597		A	G	0.135
rs7847479	9	102622237	NR4A3	A	G	0.274155		A	G	0.2625
rs790260	6	154538413	IPCEF1	G	A	0.312796		G	A	0.2175
rs7963720	12	72366186	TPH2	G	A	0.481043		G	A	0.405
rs8071667	17	28552773	SLC6A4	A	G	0.122038		A	G	0.11
rs8084125	18	74952758	MBP/GALR1	G	A	0.112559		G	A	0.1425
rs8097893	18	74983055	GALR1/LOC100132713	G	A	0.180095		G	A	0.2525
rs835540	5	174863891	DRD1/MSX2	A	G	0.441667		G	A	0.46
rs878825	22	21982249	UNKNOWN/UBE2L3	A	G	0.319905		A	G	0.3175
rs887200	22	19963666	ARVCF	G	A	0.450237		A	G	0.345
rs9303628	17	28527228	SLC6A4	A	G	0.280806		A	G	0.3
rs9322446	6	154408702	OPRM1	-	-	-		A	G	0.0879397
rs9322447	6	154424321	OPRM1	A	G	0.417062		G	A	0.365
rs9397692	6	154487315	IPCEF1	T	A	0.0781991		T	A	0.15
rs9439519	1	5364634	AJAP1/LOC100287877	G	A	0.452607		G	A	0.389447
rs9479796	6	154563653	IPCEF1	C	A	0.157583		C	A	0.075
rs950776	15	78926018	CHRNB4	G	A	0.0592417		-	-	-
rs951784	4	127667944	LOC729424/FAT4	A	G	0.491706		A	G	0.2875
rs9605030	22	19921137	TXNRD2	A	G	0.10119		-	-	-
rs963468	3	113862887	DRD3	A	G	0.4609		G	A	0.5
rs9807208	18	74974255	GALR1	A	G	0.409953		A	G	0.3375
rs9959924	18	74967894	GALR1	G	A	0.292654		G	A	0.1875

## Sheet: Suppl_Table_1b
Supplementary Table 1b. A comparison of allele frequencies for the SNPs genotyped in two Native American populations*
SNP	CHR	A1	A2	OBS	EXP	CHISQ	P	Gene	AIM
rs165824	22	A	G	93	160.5	88.61	4.8e-21	ARVCF	non-AIM
rs4695187	4	A	C	152	93.78	80.92	2.35e-19	GABRA4/GABRB1	non-AIM
rs12292915	11	A	C	204	144.1	70.74	4.067e-17	SERGEF/TPH1	non-AIM
rs211102	11	A	G	101	161.1	69.92	6.161e-17	TPH1	non-AIM
rs1124492	11	A	C	119	72.39	61.74	3.925e-15	DRD2	non-AIM
rs1159315	4	G	A	57	109.3	59.89	1.006e-14	GABRB1/GABRA4	non-AIM
rs10039221	5	G	A	119	72.98	59.75	1.079e-14	MSX2/DRD1	non-AIM
rs483481	6	G	A	72	125.9	59.74	1.081e-14	OPRM1/IPCEF1	non-AIM
rs1799971	6	G	A	0	33.35	59.64	1.142e-14	OPRM1	non-AIM
rs7694035	4	A	C	15	56.34	58.68	1.851e-14	GABRA4	non-AIM
rs623580	11	T	A	201	147.1	56.97	4.414e-14	TPH1/SAAL1	non-AIM
rs211107	11	A	C	171	119.4	56.05	7.062e-14	TPH1	non-AIM
rs9322447	6	A	G	211	157.3	55.95	7.422e-14	OPRM1	non-AIM
rs324582	7	G	A	170	118.7	55.35	1.009e-13	CHRM2	non-AIM
rs2850889	18	G	A	32	76.76	54.53	1.529e-13	MBP/GALR1	non-AIM
rs3849591	4	A	C	211	158.1	54.36	1.667e-13	GABRA2	non-AIM
rs1003641	11	A	G	128	82.43	53.82	2.195e-13	ANKK1/DRD2	non-AIM
rs563649	6	A	G	135	88.86	52.54	4.209e-13	OPRM1	non-AIM
rs1424572	7	G	A	184	133.1	52.18	5.058e-13	CHRM2	non-AIM
rs16822416	3	A	G	64	33.28	50.64	1.108e-12	DRD3	non-AIM
rs2519155	9	G	A	44	20.42	46.61	8.672e-12	DBH	non-AIM
rs1364403	7	A	G	80	127.4	46.55	8.941e-12	CHRM2	non-AIM
rs174699	22	G	A	189	141.2	45.87	1.262e-11	COMT	non-AIM
rs2221855	4	A	C	39	80.54	45.44	1.574e-11	GABRA4	non-AIM
rs7665758	4	A	C	35	75.63	45.4	1.61e-11	GABRA4	non-AIM
rs1424569	7	G	A	117	164.9	44.34	2.76e-11	CHRM2	non-AIM
rs887200	22	A	G	106	153.5	43.95	3.366e-11	ARVCF	non-AIM
rs17168817	7	A	G	39	79.41	43.41	4.439e-11	CHRM2	non-AIM
rs514980	6	G	A	136	94.53	40.85	1.646e-10	OPRM1	non-AIM
rs40184	5	A	G	84	51.14	40.33	2.147e-10	SLC6A3	non-AIM
rs2113550	7	G	A	101	146	39.7	2.968e-10	CHRM2	non-AIM
rs4648318	11	G	A	109	72.22	38.44	5.638e-10	DRD2	non-AIM
rs174696	22	A	G	7	32.52	35.66	2.35e-09	COMT	non-AIM
rs10488602	7	G	A	111	153.1	34.58	4.095e-09	CHRM2	non-AIM
rs11747728	5	G	A	69	41.22	34.35	4.612e-09	DRD1/MSX2	non-AIM
rs5326	5	A	G	26	56.34	31.61	1.885e-08	DRD1	non-AIM
rs1850744	4	A	G	93	61.64	31.48	2.015e-08	SLC2A9/DRD5	non-AIM
rs10993947	9	A	G	32	15.19	31.37	2.128e-08	DBH	non-AIM
rs4436578	11	G	A	92	60.88	31.29	2.222e-08	DRD2	non-AIM
rs17065021	5	A	G	35	67.31	31.24	2.277e-08	MSX2/DRD1	non-AIM
rs2119767	4	T	A	96	135.4	31.05	2.508e-08	GABRA2	non-AIM
rs3798683	6	A	G	35	66.48	30.02	4.286e-08	OPRM1	non-AIM
rs5374	18	G	A	81	117.6	28.33	1.023e-07	GALR1	non-AIM
rs10748185	12	G	A	116	153.8	27.94	1.25e-07	TPH2	non-AIM
rs5381	18	A	G	8	29.52	27.89	1.283e-07	GALR1	non-AIM
rs512053	6	A	C	139	104.7	26.29	2.936e-07	OPRM1	non-AIM
rs4870268	6	G	A	41	71.09	26.03	3.363e-07	IPCEF1/OPRM1	non-AIM
rs1893829	18	A	G	188	151.6	25.79	3.806e-07	GALR1/MBP	non-AIM
rs324594	7	G	A	101	136.7	25.57	4.263e-07	CHRM2	non-AIM
rs12208947	6	A	G	45	25.71	25.19	5.2e-07	IPCEF1	non-AIM
rs1028005	4	A	G	81	115.3	25.15	5.301e-07	GABRA4	non-AIM
rs167771	3	G	A	93	64.66	24.78	6.441e-07	DRD3	non-AIM
rs1800497	11	G	A	133	100.3	24.63	6.94e-07	ANKK1	non-AIM
rs2873804	9	G	A	98	69.2	24.33	8.135e-07	DBH	non-AIM
rs3025373	9	G	A	10	30.08	23.77	1.085e-06	DBH/FAM163B	non-AIM
rs174675	22	G	A	107	141.3	23.29	1.392e-06	COMT	non-AIM
rs2455391	5	A	G	106	76.94	22.99	1.631e-06	SLC6A3	non-AIM
rs3735028	7	G	A	95	128.2	22.48	2.123e-06	CHRM2	non-AIM
rs265976	5	A	C	8	25.95	21.75	3.098e-06	MSX2/DRD1	non-AIM
rs11503014	4	C	G	33	58.52	21.72	3.163e-06	GABRA2	non-AIM
rs6878159	5	T	A	25	47.64	20.18	7.035e-06	DRD1/SFXN1	non-AIM
rs1541332	9	G	A	85	60.26	19.96	7.909e-06	DBH	non-AIM
rs1127313	1	G	A	192	161.1	18.51	1.688e-05	ADAR	non-AIM
rs4870266	6	A	G	78	106.3	17.75	2.521e-05	OPRM1	non-AIM
rs4646316	22	A	G	13	30.32	17.51	2.854e-05	COMT	non-AIM
rs9479757	6	A	G	25	13.23	17.5	2.877e-05	OPRM1	non-AIM
rs11942294	4	G	A	55	80.73	17.42	2.991e-05	ZNF330/LOC100286983	non-AIM
rs1398174	4	A	C	78	105.9	17.31	3.176e-05	GABRA4	non-AIM
rs9605030	22	A	G	12	28.49	16.82	4.119e-05	TXNRD2	non-AIM
rs9479796	6	C	A	17	34.41	15.78	7.097e-05	IPCEF1	non-AIM
rs17115583	11	A	G	2	0.2275	15.63	7.719e-05	DRD2	non-AIM
rs16859227	4	A	G	58	82.43	15.47	8.365e-05	GABRG1/GABRA2	non-AIM
rs17641660	4	A	C	106	133.1	14.9	0.0001131	GABRA4	non-AIM
rs2072658	1	A	G	32	52.18	14.88	0.0001148	CHRNB2/UBE2Q1	non-AIM
rs1519551	4	G	A	126	153.5	14.74	0.0001233	LOC100286983	non-AIM
rs2734831	11	C	A	13	28.36	14.61	0.0001322	DRD2	non-AIM
rs2019884	12	C	G	93	70.71	14.34	0.0001526	LOC121456/RMST	non-AIM
rs13117878	4	G	A	128	155	14.21	0.0001639	IL15	non-AIM
rs6947206	7	C	G	20	37.06	14.2	0.0001648	CHRM2	non-AIM
rs9807208	18	A	G	104	130.5	14.2	0.0001648	GALR1	non-AIM
rs6944132	7	A	T	190	163	14.14	0.0001698	CHRM2	non-AIM
rs617648	6	A	G	24	13.61	13.28	0.0002689	OPRM1	non-AIM
rs247008	5	A	G	117	93.78	12.87	0.0003332	P4HA2/CSF2	non-AIM
rs2937639	5	G	A	115	92.47	12.23	0.0004697	SLC6A3	non-AIM
rs3762607	4	G	A	16	8.319	11.68	0.0006303	GABRA4/GABRB1	non-AIM
rs1611115	9	A	G	96	119.4	11.5	0.0006947	FAM163B/DBH	non-AIM
rs2000841	18	T	A	89	69.2	11.5	0.0006966	GALR1/LOC100132713	non-AIM
rs2519154	9	A	G	58	41.97	11.25	0.000795	DBH	non-AIM
rs8097893	18	G	A	85	65.79	11.23	0.000805	GALR1/LOC100132713	non-AIM
rs4565946	12	A	G	114	92.64	10.97	0.0009261	TPH2	non-AIM
rs790260	6	G	A	67	87.35	10.33	0.001307	IPCEF1	non-AIM
rs11762896	7	A	G	21	34.95	10.02	0.001548	CHRM2/PTN	non-AIM
rs10833	4	A	G	12	23.55	9.823	0.001724	IL15	non-AIM
rs324650	7	A	T	21	34.66	9.77	0.001774	CHRM2	non-AIM
rs737866	22	G	A	18	31.01	9.667	0.001876	COMT	non-AIM
rs129885	9	A	C	162	140.1	9.564	0.001984	DBH/SARDH	non-AIM
rs9397692	6	T	A	50	36.3	9.323	0.002262	IPCEF1	non-AIM
rs5993883	22	C	A	49	66.55	9.299	0.002293	COMT	non-AIM
rs3935748	12	G	C	71	90.37	9.166	0.002466	TBC1D15/TPH2	non-AIM
rs2129575	12	A	C	116	137.3	9.019	0.002672	TPH2	non-AIM
rs1111418	7	G	A	60	78.27	8.966	0.00275	CHRM2	non-AIM
rs613355	6	C	A	58	43.49	8.955	0.002767	OPRM1/IPCEF1	non-AIM
rs13152740	4	A	G	39	54.83	8.792	0.003025	GABRA2	non-AIM
rs1799978	11	G	A	46	33.28	8.686	0.003207	TMPRSS5/DRD2	non-AIM
rs548646	6	A	G	53	39.33	8.663	0.003247	OPRM1	non-AIM
rs2280075	4	G	A	18	10.59	8.61	0.003344	GABRA4	non-AIM
rs77905	9	A	G	46	62.44	8.599	0.003363	DBH	non-AIM
rs10485058	6	G	A	31	20.8	8.577	0.003405	OPRM1/IPCEF1	non-AIM
rs2007153	9	A	G	108	128.5	8.565	0.003426	DBH	non-AIM
rs7780181	7	C	A	24	37.06	8.318	0.003925	CHRM2/PTN	non-AIM
rs17529477	11	A	G	10	19.66	8.107	0.004408	DRD2	non-AIM
rs732833	9	G	A	111	130.8	7.97	0.004755	DBH	non-AIM
rs2519148	9	G	A	183	163.1	7.723	0.005452	FAM163B/DBH	non-AIM
rs1364402	7	G	A	1	6.428	7.508	0.006143	CHRM2	non-AIM
rs6850492	4	A	G	19	30.32	7.481	0.006236	IL15	non-AIM
rs2134655	3	A	G	33	46.51	7.33	0.006779	DRD3	non-AIM
rs11042978	11	C	A	143	124.2	7.311	0.006853	TH/ASCL2	non-AIM
rs835540	5	A	G	178	158.8	7.18	0.007371	DRD1/MSX2	non-AIM
rs9322446	6	A	G	31	21.52	7.166	0.007429	OPRM1	non-AIM
rs4680	22	A	G	92	109.9	7.042	0.007962	COMT	non-AIM
rs2156641	18	C	A	65	81.3	6.95	0.008381	LOC100132713/GALR1	non-AIM
rs12707339	7	G	A	4	10.59	6.801	0.009113	CHRM2	non-AIM
rs9959924	18	G	A	67	83.19	6.752	0.009363	GALR1	non-AIM
rs9332377	22	A	G	7	14.37	6.345	0.01177	COMT	non-AIM
rs4938019	11	G	A	139	156.9	6.236	0.01251	DRD2	non-AIM
rs17168865	7	G	A	0	3.781	6.144	0.01319	CHRM2	non-AIM
rs12508866	4	G	A	118	135.4	6.046	0.01394	LOC100286983	non-AIM
rs4274224	11	G	A	100	84.7	5.958	0.01465	DRD2	non-AIM
rs2895680	5	G	A	9	16.64	5.929	0.01489	STK32A	non-AIM
rs16851641	4	A	G	1	5.294	5.685	0.01711	GABRA4	non-AIM
rs7022059	9	A	G	41	53.56	5.657	0.01738	NR4A3	non-AIM
rs569284	6	C	A	55	68.82	5.623	0.01772	IPCEF1/OPRM1	non-AIM
rs7963720	12	G	A	134	150.5	5.313	0.02117	TPH2	non-AIM
rs4074376	11	A	C	4	9.453	5.201	0.02257	DEAF1	non-AIM
rs6582072	12	A	G	39	50.67	5.094	0.024	TPH2	non-AIM
rs10271552	7	G	A	2	6.428	4.997	0.0254	CHRM2	non-AIM
rs12229394	12	A	G	125	140.7	4.862	0.02745	TPH2	non-AIM
rs1405209	9	G	A	41	52.56	4.852	0.02761	NR4A3	non-AIM
rs1386483	12	A	G	181	165.2	4.804	0.02839	TPH2	non-AIM
rs569207	15	G	A	34	44.62	4.69	0.03034	CHRNA5	non-AIM
rs6495308	15	A	G	34	44.62	4.69	0.03034	CHRNA3	non-AIM
rs2350780	7	A	G	58	70.71	4.663	0.03082	CHRM2	non-AIM
rs11179003	12	A	G	31	41.22	4.644	0.03116	TPH2	non-AIM
rs265971	5	G	A	51	63.15	4.635	0.03132	MSX2/DRD1	non-AIM
rs554112	4	C	A	165	149.7	4.579	0.03237	GABRA2	non-AIM
rs10891552	11	A	T	136	151.3	4.538	0.03315	DRD2	non-AIM
rs279849	4	C	A	163	147.8	4.527	0.03337	GABRA2	non-AIM
rs17537141	4	G	A	1	4.538	4.491	0.03407	GABRA2	non-AIM
rs4809957	20	G	A	146	131.2	4.427	0.03538	CYP24A1	non-AIM
rs2630351	3	A	G	29	21.55	4.419	0.03554	DRD3	non-AIM
rs7685396	4	A	C	5	10.21	4.405	0.03583	DRD5/SLC2A9	non-AIM
rs10519613	4	A	C	179	164.1	4.3	0.03811	IL15	non-AIM
rs10053602	5	G	A	86	73.74	4.212	0.04014	SLC6A3	non-AIM
rs279858	4	A	G	164	149.4	4.189	0.0407	GABRA2	non-AIM
rs1076153	9	A	C	167	152.4	4.184	0.04081	FAM163B/DBH	non-AIM
rs4975646	5	A	G	9	15.13	4.175	0.04104	SLC6A3	non-AIM
rs10840491	11	A	G	45	35.92	4.131	0.04209	TH/ASCL2	non-AIM
rs16969968	15	A	G	15	22.31	4.124	0.04228	CHRNA5	non-AIM
rs1042098	5	G	A	5	9.854	3.963	0.0465	SLC6A3	non-AIM
rs6957496	7	G	A	1	4.159	3.904	0.04818	LUZP6/MTPN	non-AIM
rs7759388	6	A	G	2	5.672	3.885	0.04873	IPCEF1	non-AIM
rs1611114	9	A	G	177	163	3.817	0.05074	FAM163B/DBH	non-AIM
rs578776	15	G	A	33	42.35	3.801	0.05122	CHRNA3	non-AIM
rs10242108	7	G	A	57	68.18	3.706	0.05422	CHRM2	non-AIM
rs17110566	12	A	G	121	108.1	3.64	0.05642	TPH2	non-AIM
rs6837991	4	A	G	9	14.37	3.368	0.06647	LOC100286983	non-AIM
rs10879352	12	A	G	87	99.07	3.367	0.06652	TPH2	non-AIM
rs10506645	12	A	G	78	89.62	3.313	0.06872	TPH2	non-AIM
rs9332351	22	G	A	2	0.758	3.281	0.07009	COMT	non-AIM
rs1048953	5	A	G	12	17.81	3.224	0.07257	SLC6A3	non-AIM
rs17641411	4	A	G	161	148.2	3.194	0.07393	GABRA4	non-AIM
rs17110690	12	A	G	78	89.24	3.109	0.07784	TPH2	non-AIM
rs10743149	11	A	G	5	9.075	3.022	0.08215	ASCL2/TH	non-AIM
rs6841454	4	A	C	9	13.99	2.985	0.08401	IL15	non-AIM
rs7847479	9	A	G	82	92.99	2.927	0.0871	NR4A3	non-AIM
rs17110489	12	G	A	78	88.86	2.912	0.08795	TPH2	non-AIM
rs13106911	4	A	G	175	163	2.799	0.09431	IL15	non-AIM
rs17277929	6	G	A	1	3.403	2.754	0.09701	IPCEF1	non-AIM
rs7806357	7	A	G	40	32.9	2.734	0.09824	CHRM2	non-AIM
rs8084125	18	G	A	47	39.33	2.729	0.09856	MBP/GALR1	non-AIM
rs7483056	11	A	G	59	68.44	2.636	0.1045	TH	non-AIM
rs12130403	1	G	A	103	92.64	2.58	0.1082	CHRNB2	non-AIM
rs3971872	15	A	G	50	42.35	2.544	0.1107	LOC646934/CHRNB4	non-AIM
rs950776	15	G	A	12	17.02	2.503	0.1136	CHRNB4	non-AIM
rs13203628	6	G	A	29	23.36	2.352	0.1251	OPRM1/IPCEF1	non-AIM
rs6495309	15	G	A	84	74.87	2.309	0.1286	CHRNA3/CHRNB4	non-AIM
rs2797853	9	A	G	32	26.15	2.284	0.1307	DBH	non-AIM
rs656905	6	G	A	29	23.44	2.275	0.1314	OPRM1	non-AIM
rs9439519	1	G	A	130	140.7	2.254	0.1333	AJAP1/LOC100287877	non-AIM
rs686	5	G	A	99	89.62	2.161	0.1415	DRD1	non-AIM
rs1424543	7	C	G	19	24.49	2.128	0.1446	CHRM2	non-AIM
rs963468	3	A	G	169	158.8	2.011	0.1562	DRD3	non-AIM
rs1872824	12	A	G	160	150.5	1.763	0.1842	LOC283392/TPH2	non-AIM
rs11264222	1	A	G	32	26.85	1.728	0.1886	ADAR/CHRNB2	non-AIM
rs3025405	9	G	A	40	46.51	1.702	0.192	DBH	non-AIM
rs464049	5	A	G	137	146.3	1.697	0.1927	SLC6A3	non-AIM
rs11133762	5	A	G	41	47.48	1.664	0.1971	SLC6A3/CLPTM1L	non-AIM
rs3025382	9	A	G	5	7.597	1.464	0.2263	DBH	non-AIM
rs12537831	7	A	G	17	21.18	1.413	0.2346	CHRM2	non-AIM
rs3773678	3	A	G	31	26.47	1.354	0.2447	DRD3	non-AIM
rs518596	6	G	A	53	47.64	1.129	0.288	OPRM1/IPCEF1	non-AIM
rs3758653	11	G	A	140	132.7	1.067	0.3016	SCT/DRD4	non-AIM
rs2055942	4	G	A	19	15.88	1.033	0.3095	GABRA4	non-AIM
rs7633291	3	C	A	104	97.56	0.9676	0.3253	DRD3	non-AIM
rs11179056	12	A	G	58	63.35	0.9009	0.3425	TPH2	non-AIM
rs8071667	17	A	G	36	40.46	0.8993	0.343	SLC6A4	non-AIM
rs1386493	12	A	G	56	61.26	0.8887	0.3458	TPH2	non-AIM
rs3756450	5	G	A	91	97.04	0.8537	0.3555	SLC6A3/LPCAT1	non-AIM
rs2717162	18	G	A	115	121.4	0.8492	0.3568	GALR1	non-AIM
rs11179045	12	A	T	47	51.8	0.8479	0.3571	TPH2	non-AIM
rs2519147	9	G	A	39	34.95	0.846	0.3577	FAM163B/DBH	non-AIM
rs1160093	4	C	G	28	24.58	0.8262	0.3634	GABRA4	non-AIM
rs1487276	12	A	G	9	11.34	0.8055	0.3695	TPH2	non-AIM
rs10819700	9	A	G	169	162.6	0.7938	0.373	NR4A3/LOC441461	non-AIM
rs13193545	6	G	A	21	18.15	0.7602	0.3833	IPCEF1/OPRM1	non-AIM
rs7315855	12	A	G	54	58.61	0.7074	0.4003	TPH2	non-AIM
rs10033500	4	A	G	18	15.5	0.6774	0.4105	GABRA4	non-AIM
rs12654851	5	A	C	90	95.29	0.6614	0.4161	LPCAT1/SLC6A3	non-AIM
rs27048	5	A	G	72	67.31	0.6591	0.4169	SLC6A3	non-AIM
rs1455857	7	G	A	59	63.53	0.6406	0.4235	CHRM2	non-AIM
rs4245147	11	G	A	75	70.33	0.6312	0.4269	DRD2	non-AIM
rs1042173	17	A	C	96	101.1	0.6027	0.4376	SLC6A4	non-AIM
rs6537064	4	G	A	138	143.3	0.5565	0.4557	INPP4B/IL15	non-AIM
rs7131056	11	A	C	120	115	0.5446	0.4605	DRD2	non-AIM
rs6856130	4	G	A	55	51.43	0.4721	0.492	GABRA2/COX7B2	non-AIM
rs129930	9	A	C	46	42.73	0.4616	0.4969	SARDH	non-AIM
rs6356	11	G	A	108	103.6	0.4347	0.5097	TH	non-AIM
rs165774	22	A	G	17	15.1	0.4007	0.5267	COMT	non-AIM
rs1131339	9	G	A	80	83.95	0.3986	0.5278	NR4A3	non-AIM
rs12231356	12	A	G	50	53.32	0.3948	0.5298	TPH2	non-AIM
rs2066713	17	A	G	82	85.84	0.3714	0.5423	SLC6A4	non-AIM
rs12422191	11	A	G	8	9.453	0.3694	0.5433	ANKK1/DRD2	non-AIM
rs1079785	11	A	G	55	51.92	0.3478	0.5554	SAAL1/TPH1	non-AIM
rs11179022	12	A	G	48	51.05	0.3454	0.5567	TPH2	non-AIM
rs615470	15	A	G	18	19.97	0.3301	0.5656	CHRNA5	non-AIM
rs541418	4	A	G	143	139.2	0.2942	0.5876	GABRA2	non-AIM
rs573400	4	A	G	143	139.2	0.2942	0.5876	GABRA2	non-AIM
rs2322301	4	G	A	137	140.7	0.2662	0.6059	IL15	non-AIM
rs769224	22	A	G	2	1.519	0.2459	0.62	COMT	non-AIM
rs2234689	11	G	C	9	10.21	0.2375	0.626	ANKK1/DRD2	non-AIM
rs13295822	9	A	G	101	97.94	0.2184	0.6403	NR4A3/SEC61B	non-AIM
rs172423	11	G	A	28	29.87	0.2072	0.649	TPH1	non-AIM
rs11179065	12	A	G	58	60.5	0.2031	0.6522	TPH2	non-AIM
rs9303628	17	A	G	94	96.8	0.1839	0.6681	SLC6A4	non-AIM
rs1487275	12	C	A	95	92.26	0.1804	0.671	TPH2	non-AIM
rs6467694	7	G	A	25	23.44	0.1784	0.6727	LUZP6/MTPN	non-AIM
rs1843812	12	A	G	8	7.185	0.152	0.6967	TPH2	non-AIM
rs250682	5	C	G	109	111.5	0.1409	0.7074	SLC6A3	non-AIM
rs3732790	3	A	T	138	140.7	0.1407	0.7075	DRD3/QTRTD1	non-AIM
rs403636	5	A	C	125	127.3	0.1124	0.7374	SLC6A3	non-AIM
rs2900223	9	G	A	153	151.1	0.07351	0.7863	NR4A3	non-AIM
rs3792211	4	A	C	19	18.15	0.06758	0.7949	GABRA4	non-AIM
rs265975	5	A	G	48	46.89	0.04929	0.8243	MSX2/DRD1	non-AIM
rs140701	17	G	A	122	122.9	0.01655	0.8976	SLC6A4	non-AIM
rs2295676	6	G	A	137	136.1	0.01522	0.9018	IPCEF1	non-AIM
rs11246221	11	G	A	49	48.4	0.01394	0.906	SCT/DRD4	non-AIM
rs16859700	4	G	A	2	1.891	0.01021	0.9195	GABRA4	non-AIM
rs6271	9	A	G	2	1.899	0.008647	0.9259	DBH	non-AIM
rs6589377	11	G	A	26	25.71	0.005578	0.9405	DRD2/TMPRSS5	non-AIM
rs2072660	1	A	G	90	90.41	0.004062	0.9492	CHRNB2	non-AIM
rs1948	15	A	G	21	20.8	0.003386	0.9536	CHRNB4	non-AIM
rs1402812	4	G	C	108	107.8	0.001191	0.9725	LOC100286983/ZNF330	non-AIM
rs17354547	4	C	A	108	107.8	0.001191	0.9725	ZNF330/LOC100286983	non-AIM
rs4956396	4	A	G	108	107.8	0.001191	0.9725	LOC100286983/ZNF330	non-AIM
rs3776511	5	A	G	6	6.05	0.0006791	0.9792	SLC6A3	non-AIM
rs12516758	5	G	A	8	7.959	0.0003497	0.9851	SLC6A3/CLPTM1L	non-AIM
rs717091	13	A	G	111	64.41	67.74	1.863e-16	LOC121838/LOC100287738	AIM
rs2613964	3	G	A	76	131.6	62.49	2.681e-15	BOC/C3orf17	AIM
rs4646	15	C	A	104	156.2	52.85	3.594e-13	CYP19A1	AIM
rs951784	4	A	G	85	133.5	47.3	6.091e-12	LOC729424/FAT4	AIM
rs2829556	21	C	G	89	136.1	44.42	2.65e-11	NCAM2/NCRNA00158	AIM
rs1344870	3	A	C	53	93.02	38.42	5.701e-10	VENTXP7/SGOL1	AIM
rs1506069	1	G	A	63	103.2	36.55	1.491e-09	DNAH14	AIM
rs1808089	8	A	G	25	55.21	31.84	1.671e-08	CRISPLD1/HNF4G	AIM
rs3340	5	A	G	102	141.4	30.75	2.938e-08	SAP30L	AIM
rs1461227	5	T	A	45	77.52	28.58	8.975e-08	GRIA1	AIM
rs2001144	6	C	A	167	132.3	24.38	7.901e-07	OSTM1/LOC100287366	AIM
rs2479409	1	A	G	50	80.16	24.03	9.465e-07	BSND/PCSK9	AIM
rs2317212	3	C	A	49	75.25	19.02	1.296e-05	EPHA6	AIM
rs3309	5	T	A	122	95.29	16.87	4.008e-05	LOC100289077/MAP3K1	AIM
rs4908736	1	A	G	103	131.6	16.53	4.793e-05	SLC45A1/ERRFI1	AIM
rs2752	1	C	A	157	128.9	16.03	6.225e-05	C1orf31	AIM
rs1800498	11	A	G	13	28.74	15.16	9.901e-05	DRD2	AIM
rs1469179	7	A	T	20	37.06	14.2	0.0001648	CHRM2	AIM
rs2065160	1	A	G	49	70.87	13.8	0.0002029	NFASC/LRRN2	AIM
rs4767387	12	G	C	114	140.3	13.7	0.0002143	MED13L	AIM
rs723822	1	A	T	73	96.8	13.27	0.0002698	PBX1/LMX1A	AIM
rs1881826	6	G	A	135	161.1	13.18	0.0002832	SAMD5/SASH1	AIM
rs2816	17	A	G	10	22.31	11.7	0.0006265	GUCY2D	AIM
rs4130405	8	A	C	105	83.95	11.35	0.0007534	NIPAL2/KCNS2	AIM
rs764679	16	C	G	129	152.4	10.64	0.001105	TMEM114/A2BP1	AIM
rs1980888	9	G	A	37	54.07	10.34	0.0013	SHC3/CKS2	AIM
rs1112828	4	C	A	97	119.1	10.28	0.001343	CCRN4L	AIM
rs1014263	17	A	G	125	147.1	9.57	0.001978	FLJ43826/FBXO47	AIM
rs6730157	2	A	G	15	26.85	9.136	0.002506	RAB3GAP1	AIM
rs285	8	A	G	127	148.6	9.134	0.002509	LPL	AIM
rs2149589	9	G	A	26	40.08	9.038	0.002645	LOC392352/PRUNE2	AIM
rs4885346	13	A	T	112	133.1	8.97	0.002744	LMO7	AIM
rs2888998	9	A	G	162	141.4	8.379	0.003796	LOC100288436/ACO1	AIM
rs3287	2	G	A	81	65.42	7.426	0.00643	SPTBN1	AIM
rs1373302	8	A	T	37	50.03	6.425	0.01125	TRPA1	AIM
rs1877751	20	A	G	23	34.03	6.4	0.01141	LOC645605/EDN3	AIM
rs2862	15	A	G	81	97.18	6.118	0.01338	ACTC1/AQR	AIM
rs2078588	13	A	C	33	23.88	6.042	0.01397	DACH1	AIM
rs2341823	7	C	A	132	115.3	5.93	0.01488	PLXNA4	AIM
rs1320892	7	G	A	49	62.01	5.394	0.02021	OR2A25/OR2A5	AIM
rs1800404	15	G	A	135	150.1	4.487	0.03416	OCA2	AIM
rs1464612	18	A	G	105	119.4	4.352	0.03695	CDH2/DSC3	AIM
rs2225251	1	A	G	111	97.56	4.213	0.04012	SLC2A1/FAM183A	AIM
rs2396676	7	A	G	141	127.1	3.984	0.04593	PPP1R3A/LOC100287664	AIM
rs1594335	10	G	A	123	136.8	3.941	0.04711	C10orf41/C10orf11	AIM
rs1891760	10	G	A	41	51.16	3.84	0.05005	HABP2/TCF7L2	AIM
rs563654	10	G	A	125	138.4	3.572	0.05877	PIK3AP1	AIM
rs26247	5	A	G	102	113.8	2.999	0.08331	EFNA5	AIM
rs1042602	11	A	C	9	13.99	2.985	0.08401	TYR	AIM
rs726391	12	C	G	164	152.8	2.458	0.1169	CAPZA3/PLEKHA5	AIM
rs1487214	11	G	A	27	33.65	2.351	0.1252	LOC100126784/NAV2	AIM
rs1465648	3	A	G	32	26.15	2.284	0.1307	POU1F1/HTR1F	AIM
rs1369290	18	A	C	4	2.269	2.136	0.1438	RTTN	AIM
rs2702414	4	G	A	143	153.1	2.003	0.157	LOC285501/LOC100288304	AIM
rs2695	9	G	A	65	58.99	1.197	0.274	TLE4/TLE1	AIM
rs2207782	10	G	A	43	48.51	1.179	0.2775	NRG3	AIM
rs725667	1	A	G	1	2.269	1.148	0.2841	GNG12/LOC100133029	AIM
rs292932	16	A	G	142	148.6	0.8448	0.358	ZFHX3/PMFBP1	AIM
rs1403454	4	T	A	85	80.16	0.6178	0.4319	LOC100287246/NR3C2	AIM
rs1861498	2	T	A	19	16.68	0.5486	0.4589	LOC339788	AIM
rs718387	21	A	G	106	101.3	0.4955	0.4815	RUNX1/SETD4	AIM
rs7595509	2	G	A	54	51.05	0.3241	0.5692	ETAA1/C1D	AIM
rs1435090	2	A	G	67	70.33	0.3218	0.5705	NRXN1	AIM
rs6003	1	G	A	3	3.581	0.1581	0.6909	F13B	AIM
rs718092	20	G	C	75	77.14	0.1241	0.7246	LOC339568/MAFB	AIM
rs719776	4	G	C	91	93.02	0.09793	0.7543	PCDH7/ARAP2	AIM
rs1008984	1	G	A	93	94.91	0.08656	0.7686	ATP6V1G3/NEK7	AIM
rs878825	22	A	G	104	105.9	0.07847	0.7794	UNKNOWN/UBE2L3	AIM
rs5443	12	A	G	143	141.7	0.03122	0.8597	GNB3	AIM
rs2814778	1	G	A	2	1.891	0.01021	0.9195	DARC	AIM
rs768324	3	T	A	143	142.6	0.003896	0.9502	LOC100289598/CADM2	AIM
* Green marks SNPs significantly different between the populations, after the Bonferroni correction for multiple comparisons
